# Supplementary material
Source: ML conference proceedings conference paper supplement (https://proceedings.mlr.press/v97/kveton19a.html)
Supplement: Supplementary file [file kveton19a-supp.pdf]

## A. Proof of Theorem 1

We generalize the analysis of [Agrawal and Goyal \(2013a\)](#). Since arm 1 is optimal, the regret can be written as

$$R(n) = \sum_{i=2}^K \Delta_i \mathbb{E}[T_{i,n}].$$

In the rest of the proof, we bound  $\mathbb{E}[T_{i,n}]$  for each suboptimal arm  $i$ . Fix arm  $i > 1$ . Let  $E_{i,t} = \{\hat{\mu}_{i,t} \leq \tau_i\}$  and  $\bar{E}_{i,t}$  be the complement of  $E_{i,t}$ . Then  $\mathbb{E}[T_{i,n}]$  can be decomposed as

$$\mathbb{E}[T_{i,n}] = \mathbb{E}\left[\sum_{t=1}^n \mathbb{1}\{I_t = i\}\right] = \mathbb{E}\left[\sum_{t=1}^n \mathbb{1}\{I_t = i, E_{i,t} \text{ occurs}\}\right] + \mathbb{E}\left[\sum_{t=1}^n \mathbb{1}\{I_t = i, \bar{E}_{i,t} \text{ occurs}\}\right]. \quad (10)$$

### TERM $b_i$ IN THE UPPER BOUND

We start with the second term in (10), which corresponds to  $b_i$  in our claim. This term can be tightly bounded based on the observation that event  $\bar{E}_{i,t}$  is unlikely when  $T_{i,t}$  is “large”. Let  $\mathcal{T} = \{t \in [n] : Q_{i,T_{i,t-1}}(\tau_i) > 1/n\}$ . Then

$$\begin{aligned} \mathbb{E}\left[\sum_{t=1}^n \mathbb{1}\{I_t = i, \bar{E}_{i,t} \text{ occurs}\}\right] &\leq \mathbb{E}\left[\sum_{t \in \mathcal{T}} \mathbb{1}\{I_t = i\}\right] + \mathbb{E}\left[\sum_{t \notin \mathcal{T}} \mathbb{1}\{\bar{E}_{i,t}\}\right] \\ &\leq \mathbb{E}\left[\sum_{s=0}^{n-1} \mathbb{1}\{Q_{i,s}(\tau_i) > 1/n\}\right] + \mathbb{E}\left[\sum_{t \notin \mathcal{T}} \frac{1}{n}\right] \\ &\leq \sum_{s=0}^{n-1} \mathbb{P}(Q_{i,s}(\tau_i) > 1/n) + 1. \end{aligned}$$

### TERM $a_i$ IN THE UPPER BOUND

Now we focus on the first term in (10), which corresponds to  $a_i$  in our claim. Without loss of generality, we assume that Algorithm 1 is implemented as follows. When arm 1 is pulled for the  $s$ -th time, the algorithm generates an infinite i.i.d. sequence  $(\hat{\mu}_\ell^{(s)})_\ell \sim p(\mathcal{H}_{1,s})$ . Then, instead of sampling  $\hat{\mu}_{1,t} \sim p(\mathcal{H}_{1,s})$  in round  $t$  when  $T_{1,t-1} = s$ ,  $\hat{\mu}_{1,t}$  is substituted with  $\hat{\mu}_t^{(s)}$ . Let  $M = \{t \in [n] : \max_{j>1} \hat{\mu}_{j,t} \leq \tau_i\}$  be round indices where the values of all suboptimal arms are at most  $\tau_i$  and

$$A_s = \left\{t \in M : \hat{\mu}_t^{(s)} \leq \tau_i, T_{1,t-1} = s\right\}$$

be its subset where the value of arm 1 is at most  $\tau_i$  and the arm was pulled  $s$  times before. Then

$$\sum_{t=1}^n \mathbb{1}\{I_t = i, E_{i,t} \text{ occurs}\} \leq \sum_{t=1}^n \mathbb{1}\left\{\max_j \hat{\mu}_{j,t} \leq \tau_i\right\} = \underbrace{\sum_{s=0}^{n-1} \sum_{t=1}^n \mathbb{1}\left\{\max_j \hat{\mu}_{j,t} \leq \tau_i, T_{1,t-1} = s\right\}}_{|A_s|}.$$

In the next step, we bound  $|A_s|$ . Let

$$\Lambda_s = \min\left\{t \in M : \hat{\mu}_t^{(s)} > \tau_i, T_{1,t-1} \geq s\right\}$$

be the index of the first round in  $M$  where the value of arm 1 is larger than  $\tau_i$  and the arm was pulled at least  $s$  times before. If such  $\Lambda_s$  does not exist, we set  $\Lambda_s = n$ . Let

$$B_s = \left\{t \in M \cap [\Lambda_s] : \hat{\mu}_t^{(s)} \leq \tau_i, T_{1,t-1} \geq s\right\}$$

be a subset of  $M \cap [\Lambda_s]$  where the value of arm 1 is at most  $\tau_i$  and the arm was pulled at least  $s$  times before.

We claim that  $A_s \subseteq B_s$ . By contradiction, suppose that there exists  $t \in A_s$  such that  $t \notin B_s$ . Then it must be true that  $\Lambda_s < t$ , from the definitions of  $A_s$  and  $B_s$ . From the definition of  $\Lambda_s$ , we know that arm 1 was pulled in round  $\Lambda_s$ , after it was pulled at least  $s$  times before. Therefore, it cannot be true that  $T_{1,t-1} = s$ , and thus  $t \notin A_s$ . Therefore,  $A_s \subseteq B_s$  and  $|A_s| \leq |B_s|$ . In the next step, we bound  $|B_s|$  in expectation.

Let  $\mathcal{F}_t = \sigma(\mathcal{H}_{1,T_{1,t}}, \dots, \mathcal{H}_{K,T_{K,t}}, I_1, \dots, I_t)$  be the  $\sigma$ -algebra generated by arm histories and pulled arms by the end of round  $t$ , for  $t \in [n] \cup \{0\}$ . Let  $P_s = \min \{t \in [n] : T_{1,t-1} = s\}$  be the index of the first round where arm 1 was pulled  $s$  times before. If such  $P_s$  does not exist, we set  $P_s = n + 1$ . Note that  $P_s$  is a stopping time with respect to filtration  $(\mathcal{F}_t)_t$ . Hence,  $\mathcal{G}_s = \mathcal{F}_{P_s-1}$  is well-defined and thanks to  $|A_s| \leq n$ , we have

$$\mathbb{E}[|A_s|] = \mathbb{E}[\min \{\mathbb{E}[|A_s| | \mathcal{G}_s], n\}] \leq \mathbb{E}[\min \{\mathbb{E}[|B_s| | \mathcal{G}_s], n\}].$$

We claim that  $\mathbb{E}[|B_s| | \mathcal{G}_s] \leq 1/Q_{1,s}(\tau_i) - 1$ . First, note that  $|B_s|$  can be rewritten as

$$|B_s| = \sum_{t=P_s}^{\Lambda_s} \epsilon_t \rho_t,$$

where  $\epsilon_t = \mathbb{1}\{\max_{j>1} \hat{\mu}_{j,t} \leq \tau_i\}$  control which  $\rho_t = \mathbb{1}\{\hat{\mu}_t^{(s)} \leq \tau_i\}$  contribute to the sum. Now recall Theorem 5.2 from Chapter III of [Doob \(1953\)](#).

**Theorem 3.** *Let  $X_1, X_2, \dots$  and  $Z_1, Z_2, \dots$  be two sequences of random variables and  $(\mathcal{F}_t)_t$  be a filtration. Let  $(X_t)_t$  be i.i.d.,  $X_t$  be  $\mathcal{F}_t$  measurable,  $Z_t \in \{0, 1\}$ , and  $Z_t$  be  $\mathcal{F}_{t-1}$  measurable. Let  $N_t = \min \{t > N_{t-1} : Z_t = 1\}$  for  $t \in [m]$ ,  $N_0 = 0$ , and assume that  $N_m < \infty$  almost surely. Let  $X'_t = X_{N_t}$  for  $t \in [m]$ . Then  $(X'_t)_{t=1}^m$  is i.i.d. and its elements have the same distribution as  $X_1$ .*

By the above theorem and the definition of  $\Lambda_s$ ,  $|B_s|$  has the same distribution as the number of failed independent draws from  $\text{Ber}(Q_{1,s}(\tau_i))$  until the first success, capped at  $n - P_s$ . It is well known that the expected value of this quantity, without the cap, is bounded by  $1/Q_{1,s}(\tau_i) - 1$ .

Finally, we chain all inequalities and get

$$\mathbb{E} \left[ \sum_{t=1}^n \mathbb{1}\{I_t = i, E_{i,t} \text{ occurs}\} \right] \leq \sum_{s=0}^{n-1} \mathbb{E}[\min \{1/Q_{1,s}(\tau_i) - 1, n\}].$$

This concludes our proof.

## B. Proof of Theorem 2

This proof has two parts.

### UPPER BOUND ON $b_i$ IN THEOREM 1 (SECTION 5.1)

Fix suboptimal arm  $i$ . To simplify notation, we abbreviate  $Q_{i,s}(\tau_i)$  as  $Q_{i,s}$ . Our first objective is to bound

$$b_i = \sum_{s=0}^{n-1} \mathbb{P}(Q_{i,s} > 1/n) + 1.$$

Fix the number of pulls  $s$ . When the number of pulls is ‘‘small’’,  $s \leq \frac{8\alpha}{\Delta_i^2} \log n$ , we bound  $\mathbb{P}(Q_{i,s} > 1/n)$  trivially by 1.

When the number of pulls is ‘‘large’’,  $s > \frac{8\alpha}{\Delta_i^2} \log n$ , we divide the proof based on the event that  $V_{i,s}$  is not much larger than its expectation. Define

$$E = \left\{ V_{i,s} - (\mu_i + a)s \leq \frac{\Delta_i s}{4} \right\}.$$

On event  $E$ ,

$$Q_{i,s} = \mathbb{P}\left(U_{i,s} - (\mu_i + a)s \geq \frac{\Delta_i s}{2} \mid V_{i,s}\right) \leq \mathbb{P}\left(U_{i,s} - V_{i,s} \geq \frac{\Delta_i s}{4} \mid V_{i,s}\right) \leq \exp\left[-\frac{\Delta_i^2 s}{8\alpha}\right] \leq n^{-1},$$

where the first inequality is from the definition of event  $E$ , the second inequality is by Hoeffding's inequality, and the third inequality is by our assumption on  $s$ . On the other hand, event  $\bar{E}$  is unlikely because

$$\mathbb{P}(\bar{E}) \leq \exp\left[-\frac{\Delta_i^2 s}{8\alpha}\right] \leq n^{-1},$$

where the first inequality is by Hoeffding's inequality and the last inequality is by our assumption on  $s$ . Now we apply the last two inequalities to

$$\begin{aligned} \mathbb{P}(Q_{i,s} > 1/n) &= \mathbb{E}[\mathbb{P}(Q_{i,s} > 1/n \mid V_{i,s}) \mathbf{1}\{E\}] + \mathbb{E}[\mathbb{P}(Q_{i,s} > 1/n \mid V_{i,s}) \mathbf{1}\{\bar{E}\}] \\ &\leq 0 + \mathbb{E}[\mathbf{1}\{\bar{E}\}] \leq n^{-1}. \end{aligned}$$

Finally, we chain our upper bounds for all  $s \in [n]$  and get the upper bound on  $b_i$  in (9).

#### UPPER BOUND ON $a_i$ IN THEOREM 1 (SECTION 5.1)

Fix suboptimal arm  $i$ . Our second objective is to bound

$$a_i = \sum_{s=0}^{n-1} \mathbb{E}\left[\min\left\{\frac{1}{Q_{1,s}(\tau_i)} - 1, n\right\}\right].$$

We redefine  $\tau_i$  as  $\tau_i = (\mu_1 + a)/\alpha - \Delta_i/(2\alpha)$  and abbreviate  $Q_{1,s}(\tau_i)$  as  $Q_{1,s}$ . Since  $i$  is fixed, this slight abuse of notation should not cause any confusion. For  $s > 0$ , we have

$$Q_{1,s} = \mathbb{P}\left(\frac{U_{1,s}}{\alpha s} \geq \frac{\mu_1 + a}{\alpha} - \frac{\Delta_i}{2\alpha} \mid V_{1,s}\right).$$

Let  $F_s = 1/Q_{1,s} - 1$ . Fix the number of pulls  $s$ . When  $s = 0$ ,  $Q_{1,s} = 1$  and  $\mathbb{E}[\min\{F_s, n\}] = 0$ . When the number of pulls is ‘‘small’’,  $0 < s \leq \frac{16\alpha}{\Delta_i^2} \log n$ , we apply the upper bound from Theorem 4 in Appendix C and get

$$\mathbb{E}[\min\{F_s, n\}] \leq \mathbb{E}[1/Q_{1,s}] \leq \mathbb{E}[1/\mathbb{P}(U_{1,s} \geq (\mu_1 + a)s \mid V_{1,s})] \leq c,$$

where  $c$  is defined in Theorem 2. The last inequality is by Theorem 4 in Appendix C.

When the number of pulls is ‘‘large’’,  $s > \frac{16\alpha}{\Delta_i^2} \log n$ , we divide the proof based on the event that  $V_{1,s}$  is not much smaller than its expectation. Define

$$E = \left\{(\mu_1 + a)s - V_{1,s} \leq \frac{\Delta_i s}{4}\right\}.$$

On event  $E$ ,

$$\begin{aligned} Q_{1,s} &= \mathbb{P}\left((\mu_1 + a)s - U_{1,s} \leq \frac{\Delta_i s}{2} \mid V_{1,s}\right) = 1 - \mathbb{P}\left((\mu_1 + a)s - U_{1,s} > \frac{\Delta_i s}{2} \mid V_{1,s}\right) \\ &\geq 1 - \mathbb{P}\left(V_{1,s} - U_{1,s} > \frac{\Delta_i s}{4} \mid V_{1,s}\right) \geq 1 - \exp\left[-\frac{\Delta_i^2 s}{8\alpha}\right] \geq \frac{n^2 - 1}{n^2}, \end{aligned}$$

where the first inequality is from the definition of event  $E$ , the second inequality is by Hoeffding's inequality, and the third inequality is by our assumption on  $s$ . The above lower bound yields

$$F_s = \frac{1}{Q_{1,s}} - 1 \leq \frac{n^2}{n^2 - 1} - 1 = \frac{1}{n^2 - 1} \leq n^{-1}$$

for  $n \geq 2$ . On the other hand, event  $\bar{E}$  is unlikely because

$$\mathbb{P}(\bar{E}) \leq \exp\left[-\frac{\Delta_i^2 s}{8\alpha}\right] \leq n^{-2},$$

where the first inequality is by Hoeffding's inequality and the last inequality is by our assumption on  $s$ . Now we apply the last two inequalities to

$$\begin{aligned} \mathbb{E}[\min\{F_s, n\}] &= \mathbb{E}[\mathbb{E}[\min\{F_s, n\} \mid V_{1,s}] \mathbf{1}\{E\}] + \mathbb{E}[\mathbb{E}[\min\{F_s, n\} \mid V_{1,s}] \mathbf{1}\{\bar{E}\}] \\ &\leq \mathbb{E}[n^{-1} \mathbf{1}\{E\}] + \mathbb{E}[n \mathbf{1}\{\bar{E}\}] \leq 2n^{-1}. \end{aligned}$$

Finally, we chain our upper bounds for all  $s \in [n]$  and get the upper bound on  $a_i$  in (9). This concludes our proof.

### C. Upper Bound on the Expected Inverse Probability of Being Optimistic

Theorem 4 provides an upper bound on the expected inverse probability of being optimistic,

$$\mathbb{E}[1/\mathbb{P}(U_{1,s} \geq (\mu_1 + a)s \mid V_{1,s})],$$

which is used in Section 5.2 and Appendix B. In the bound and its analysis,  $n$  is  $s$ ,  $p$  is  $\mu_1$ ,  $x$  is  $V_{1,s} - as$ , and  $y$  is  $U_{1,s}$ .

**Theorem 4.** Let  $m = (2a + 1)n$  and  $b = \frac{2a + 1}{a(a + 1)} < 2$ . Then

$$W = \sum_{x=0}^n B(x; n, p) \left[ \sum_{y=\lceil (a+p)n \rceil}^m B\left(y; m, \frac{an+x}{m}\right) \right]^{-1} \leq \frac{2e^2\sqrt{2a+1}}{\sqrt{2\pi}} \exp\left[\frac{8b}{2-b}\right] \left(1 + \sqrt{\frac{2\pi}{4-2b}}\right).$$

*Proof.* First, we apply the upper bound from Lemma 2 for

$$f(x) = \left[ \sum_{y=\lceil (a+p)n \rceil}^m B\left(y; m, \frac{an+x}{m}\right) \right]^{-1}.$$

Note that this function decreases in  $x$ , as required by Lemma 2, because the probability of observing at least  $\lceil (a+p)n \rceil$  ones increases with  $x$ , for any fixed  $\lceil (a+p)n \rceil$ . The resulting upper bound is

$$W \leq \sum_{i=0}^{i_0-1} \exp[-2i^2] \left[ \sum_{y=\lceil (a+p)n \rceil}^m B\left(y; m, \frac{(a+p)n - (i+1)\sqrt{n}}{m}\right) \right]^{-1} + \exp[-2i_0^2] \left[ \sum_{y=\lceil (a+p)n \rceil}^m B\left(y; m, \frac{an}{m}\right) \right]^{-1},$$

where  $i_0$  is the smallest integer such that  $(i_0 + 1)\sqrt{n} \geq pn$ , as defined in Lemma 2.

Second, we bound both above reciprocals using Lemma 3. The first term is bounded for  $x = pn - (i+1)\sqrt{n}$  as

$$\left[ \sum_{y=\lceil (a+p)n \rceil}^m B\left(y; m, \frac{(a+p)n - (i+1)\sqrt{n}}{m}\right) \right]^{-1} \leq \frac{e^2\sqrt{2a+1}}{\sqrt{2\pi}} \exp[b(i+2)^2].$$

The second term is bounded for  $x = 0$  as

$$\left[ \sum_{y=\lceil (a+p)n \rceil}^m B\left(y; m, \frac{an}{m}\right) \right]^{-1} \leq \frac{e^2\sqrt{2a+1}}{\sqrt{2\pi}} \exp\left[b\frac{(pn + \sqrt{n})^2}{n}\right] \leq \frac{e^2\sqrt{2a+1}}{\sqrt{2\pi}} \exp[b(i_0 + 2)^2],$$

where the last inequality is from the definition of  $i_0$ . Then we chain the above three inequalities and get

$$W \leq \frac{e^2\sqrt{2a+1}}{\sqrt{2\pi}} \sum_{i=0}^{i_0} \exp[-2i^2 + b(i+2)^2].$$

Now note that

$$2i^2 - b(i+2)^2 = (2-b) \left( i^2 - \frac{4bi}{2-b} + \frac{4b^2}{(2-b)^2} \right) - \frac{4b^2}{2-b} - 4b = (2-b) \left( i - \frac{2b}{2-b} \right)^2 - \frac{8b}{2-b}.$$

It follows that

$$\begin{aligned} W &\leq \frac{e^2 \sqrt{2a+1}}{\sqrt{2\pi}} \sum_{i=0}^{i_0} \exp \left[ -(2-b) \left( i - \frac{2b}{2-b} \right)^2 + \frac{8b}{2-b} \right] \\ &\leq \frac{2e^2 \sqrt{2a+1}}{\sqrt{2\pi}} \exp \left[ \frac{8b}{2-b} \right] \sum_{i=0}^{\infty} \exp[-(2-b)i^2] \\ &\leq \frac{2e^2 \sqrt{2a+1}}{\sqrt{2\pi}} \exp \left[ \frac{8b}{2-b} \right] \left( 1 + \int_{u=0}^{\infty} \exp \left[ -\frac{u^2}{4-2b} \right] du \right) \\ &\leq \frac{2e^2 \sqrt{2a+1}}{\sqrt{2\pi}} \exp \left[ \frac{8b}{2-b} \right] \left( 1 + \sqrt{\frac{2\pi}{4-2b}} \right). \end{aligned}$$

This concludes our proof. ■

**Lemma 2.** Let  $f(x) \geq 0$  be a decreasing function of  $x$  and  $i_0$  be the smallest integer such that  $(i_0 + 1)\sqrt{n} \geq pn$ . Then

$$\sum_{x=0}^n B(x; n, p) f(x) \leq \sum_{i=0}^{i_0-1} \exp[-2i^2] f(pn - (i+1)\sqrt{n}) + \exp[-2i_0^2] f(0).$$

*Proof.* Let

$$\mathcal{X}_i = \begin{cases} (\max\{pn - \sqrt{n}, 0\}, n], & i = 0; \\ (\max\{pn - (i+1)\sqrt{n}, 0\}, pn - i\sqrt{n}], & i > 0; \end{cases}$$

for  $i \in [i_0] \cup \{0\}$ . Then  $\{\mathcal{X}_i\}_{i=0}^{i_0}$  is a partition of  $[0, n]$ . Based on this observation,

$$\begin{aligned} \sum_{x=0}^n B(x; n, p) f(x) &= \sum_{i=0}^{i_0} \sum_{x=0}^n \mathbb{1}\{x \in \mathcal{X}_i\} B(x; n, p) f(x) \\ &\leq \sum_{i=0}^{i_0-1} f(pn - (i+1)\sqrt{n}) \sum_{x=0}^n \mathbb{1}\{x \in \mathcal{X}_i\} B(x; n, p) + f(0) \sum_{x=0}^n \mathbb{1}\{x \in \mathcal{X}_{i_0}\} B(x; n, p), \end{aligned}$$

where the inequality holds because  $f(x)$  is a decreasing function of  $x$ . Now fix  $i > 0$ . Then from the definition of  $\mathcal{X}_i$  and Hoeffding's inequality,

$$\sum_{x=0}^n \mathbb{1}\{x \in \mathcal{X}_i\} B(x; n, p) \leq \mathbb{P}(X \leq pn - i\sqrt{n} \mid X \sim B(n, p)) \leq \exp[-2i^2].$$

Trivially,  $\sum_{x=0}^n \mathbb{1}\{x \in \mathcal{X}_0\} B(x; n, p) \leq 1 = \exp[-2 \cdot 0^2]$ . Finally, we chain all inequalities and get our claim. ■

**Lemma 3.** Let  $x \in [0, pn]$ ,  $m = (2a+1)n$ , and  $b = \frac{2a+1}{a(a+1)}$ . Then for any integer  $n > 0$ ,

$$\sum_{y=\lceil (a+p)n \rceil}^m B\left(y; m, \frac{an+x}{m}\right) \geq \frac{\sqrt{2\pi}}{e^2 \sqrt{2a+1}} \exp\left[-b \frac{(pn + \sqrt{n} - x)^2}{n}\right].$$

*Proof.* By Lemma 4,

$$B\left(y; m, \frac{an+x}{m}\right) \geq \frac{\sqrt{2\pi}}{e^2} \sqrt{\frac{m}{y(m-y)}} \exp\left[-\frac{(y-an-x)^2}{m \frac{an+x}{m} \frac{(a+1)n-x}{m}}\right].$$

Now note that

$$\frac{y(m-y)}{m} \leq \frac{1}{m} \frac{m^2}{4} = \frac{(2a+1)n}{4}.$$

Moreover, since  $x \in [0, pn]$ ,

$$m \frac{an+x}{m} \frac{(a+1)n-x}{m} \geq m \frac{an}{m} \frac{(a+1)n}{m} = \frac{a(a+1)n}{2a+1} = \frac{n}{b},$$

where  $b$  is defined in the claim of this lemma. Now we combine the above three inequalities and have

$$B\left(y; m, \frac{an+x}{m}\right) \geq \frac{2\sqrt{2\pi}}{e^2 \sqrt{2a+1}} \frac{1}{\sqrt{n}} \exp\left[-b \frac{(y-an-x)^2}{n}\right],$$

Finally, note the following two facts. First, the above lower bound decreases in  $y$  when  $y \geq (a+p)n$  and  $x \leq pn$ . Second, by the pigeonhole principle, there exist at least  $\lfloor \sqrt{n} \rfloor$  integers between  $(a+p)n$  and  $(a+p)n + \sqrt{n}$ , starting with  $\lceil (a+p)n \rceil$ . These observations lead to a trivial lower bound

$$\begin{aligned} \sum_{y=\lceil (a+p)n \rceil}^m B\left(y; m, \frac{an+x}{m}\right) &\geq \frac{\lfloor \sqrt{n} \rfloor}{\sqrt{n}} \frac{2\sqrt{2\pi}}{e^2 \sqrt{2a+1}} \exp\left[-b \frac{(pn + \sqrt{n} - x)^2}{n}\right] \\ &\geq \frac{\sqrt{2\pi}}{e^2 \sqrt{2a+1}} \exp\left[-b \frac{(pn + \sqrt{n} - x)^2}{n}\right]. \end{aligned}$$

The last inequality is from  $\lfloor \sqrt{n} \rfloor / \sqrt{n} \geq 1/2$ , which holds for  $n \geq 1$ . This concludes our proof. ■

**Lemma 4.** For any binomial probability,

$$B(x; n, p) \geq \frac{\sqrt{2\pi}}{e^2} \sqrt{\frac{n}{x(n-x)}} \exp\left[-\frac{(x-pn)^2}{p(1-p)n}\right].$$

*Proof.* By Stirling's approximation, for any integer  $k \geq 0$ ,

$$\sqrt{2\pi} k^{k+\frac{1}{2}} e^{-k} \leq k! \leq e k^{k+\frac{1}{2}} e^{-k}.$$

Therefore, any binomial probability can be bounded from below as

$$B(x; n, p) = \frac{n!}{x!(n-x)!} p^x q^{n-x} \geq \frac{\sqrt{2\pi}}{e^2} \sqrt{\frac{n}{x(n-x)}} \left(\frac{pn}{x}\right)^x \left(\frac{qn}{n-x}\right)^{n-x},$$

where  $q = 1 - p$ . Let

$$d(p_1, p_2) = p_1 \log \frac{p_1}{p_2} + (1-p_1) \log \frac{1-p_1}{1-p_2}$$

be the KL divergence between Bernoulli random variables with means  $p_1$  and  $p_2$ . Then

$$\begin{aligned} \left(\frac{pn}{x}\right)^x \left(\frac{qn}{n-x}\right)^{n-x} &= \exp\left[x \log\left(\frac{pn}{x}\right) + (n-x) \log\left(\frac{qn}{n-x}\right)\right] \\ &= \exp\left[-n \left(\frac{x}{n} \log\left(\frac{x}{pn}\right) + \frac{n-x}{n} \log\left(\frac{n-x}{qn}\right)\right)\right] \\ &= \exp\left[-nd\left(\frac{x}{n}, p\right)\right] \\ &\geq \exp\left[-\frac{(x-pn)^2}{p(1-p)n}\right], \end{aligned}$$

where the inequality is from  $d(p_1, p_2) \leq \frac{(p_1 - p_2)^2}{p_2(1-p_2)}$ . Finally, we chain all inequalities and get our claim. ■
